# Supplementary material for: Marine soundscape and fish biophony of a Mediterranean marine protected area
Source: PeerJ journal article supplement (doi:10.7717/peerj.12551), 2021-12-15

## SUPPLEMENTARY MATERIAL 1.

Spectrograms of the 10 occurring sounds identified as fish calls. LDS: Low frequency down-sweep; DS: Down-sweep; DSS: Down-sweep series; LPS: Low frequency pulse series; LFPT: Low frequency fast pulse train; PS: Pulse series; FPT: Fast pulse train; DSS: Down-sweep series; RPS: Regular pulse series; APPPS: Pulse series with alternating pulse period; UFPS (kwa): Ultra-fast pulse series. (FFT: 8192; Hamming window, 50% overlap)

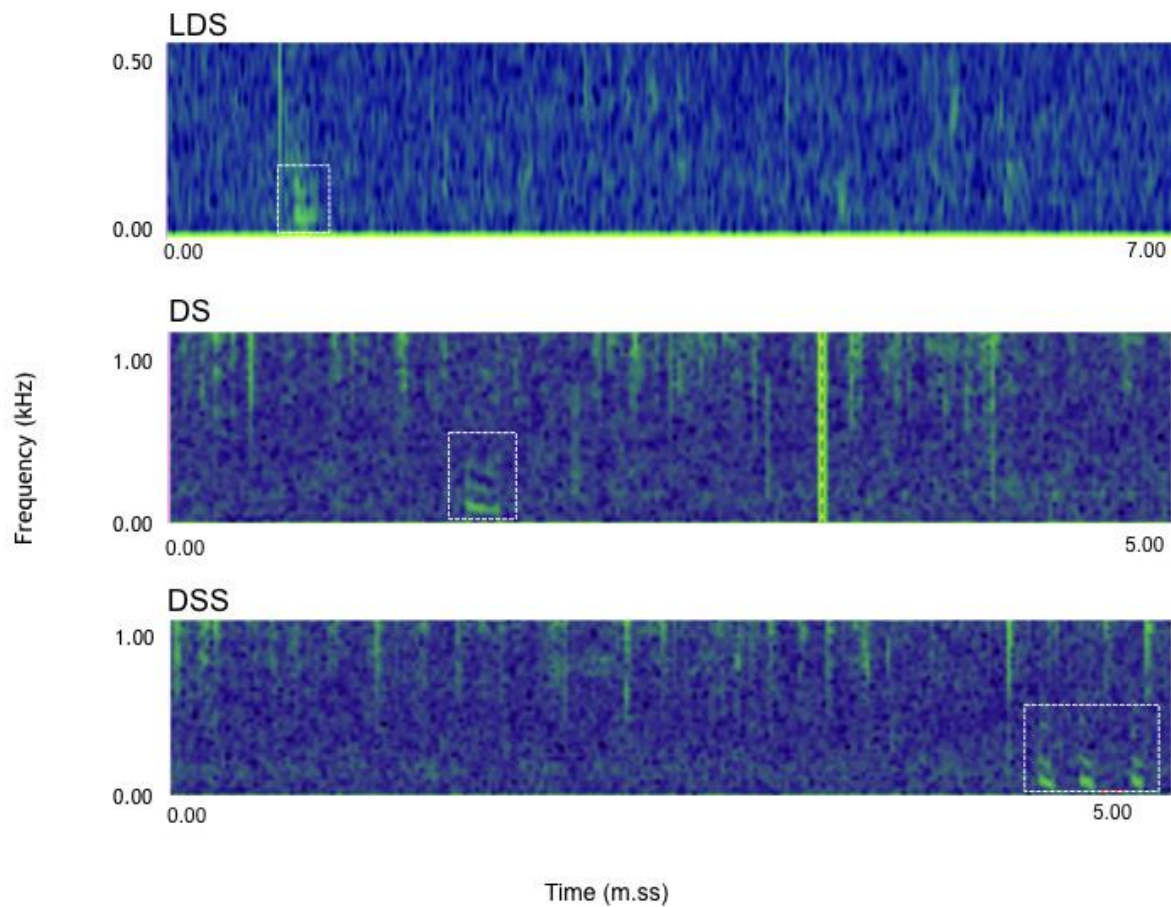

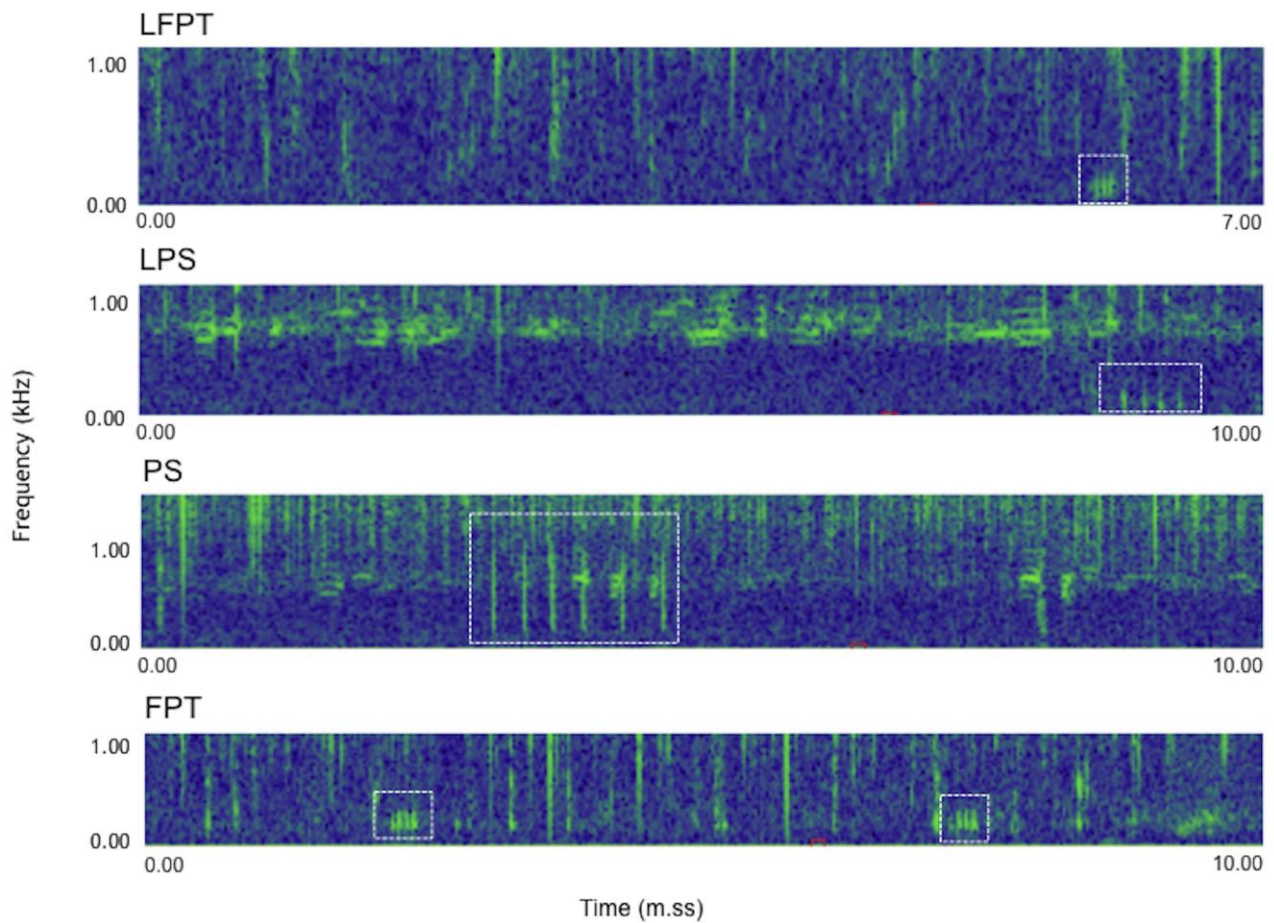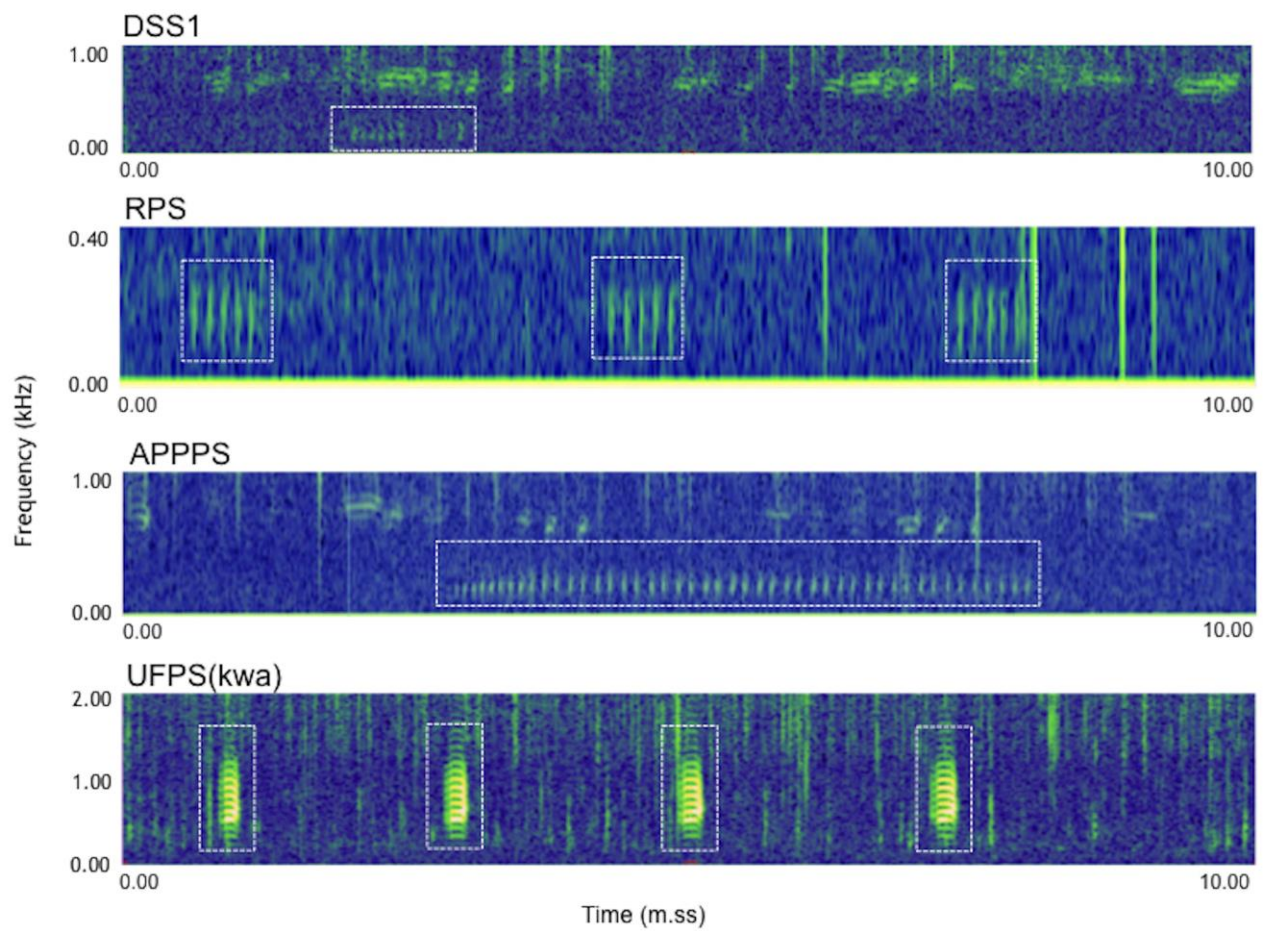

Supplement: Supp.Matt.1.pdf [file Supp.Matt.1.pdf]
