# Supplementary material for: Marine soundscape and fish biophony of a Mediterranean marine protected area
Source: PeerJ journal article supplement (doi:10.7717/peerj.12551), 2021-12-15

BR - 10 am

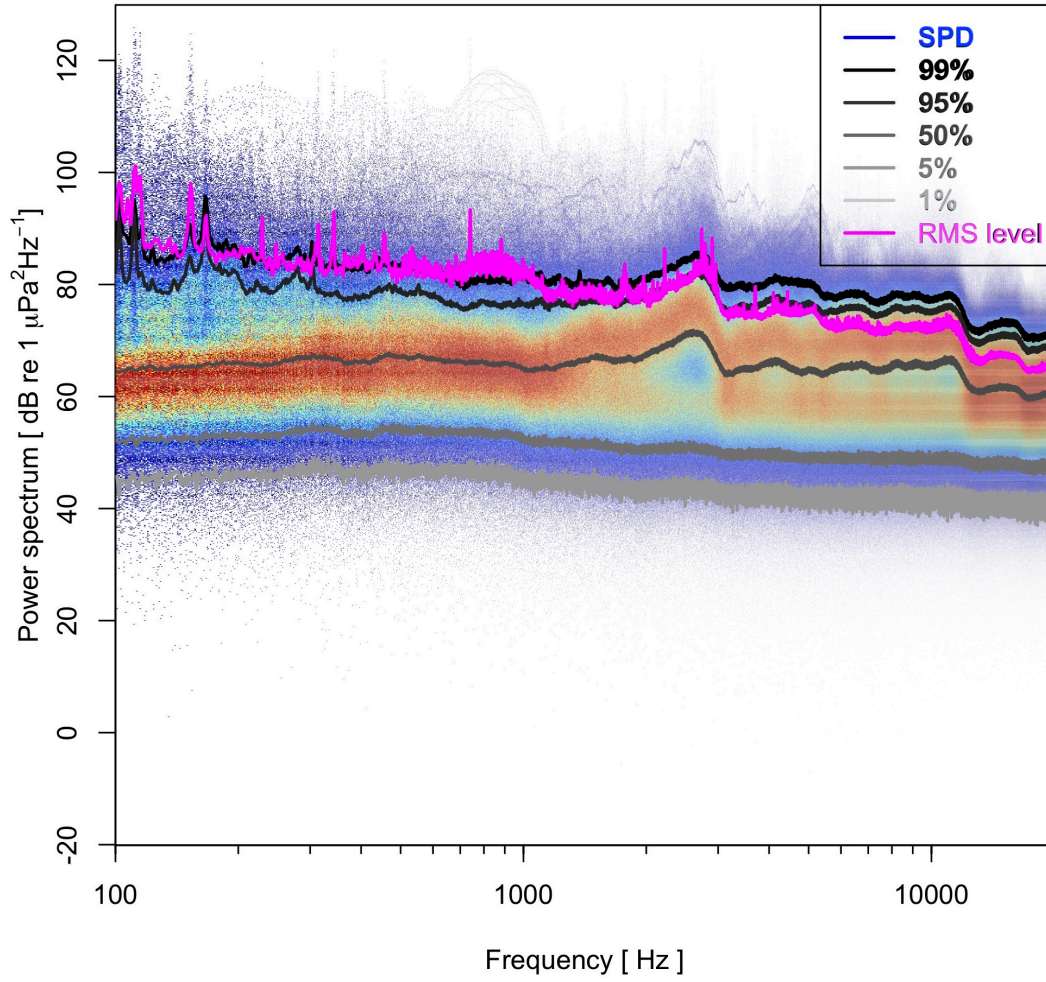

BR - 12 AM

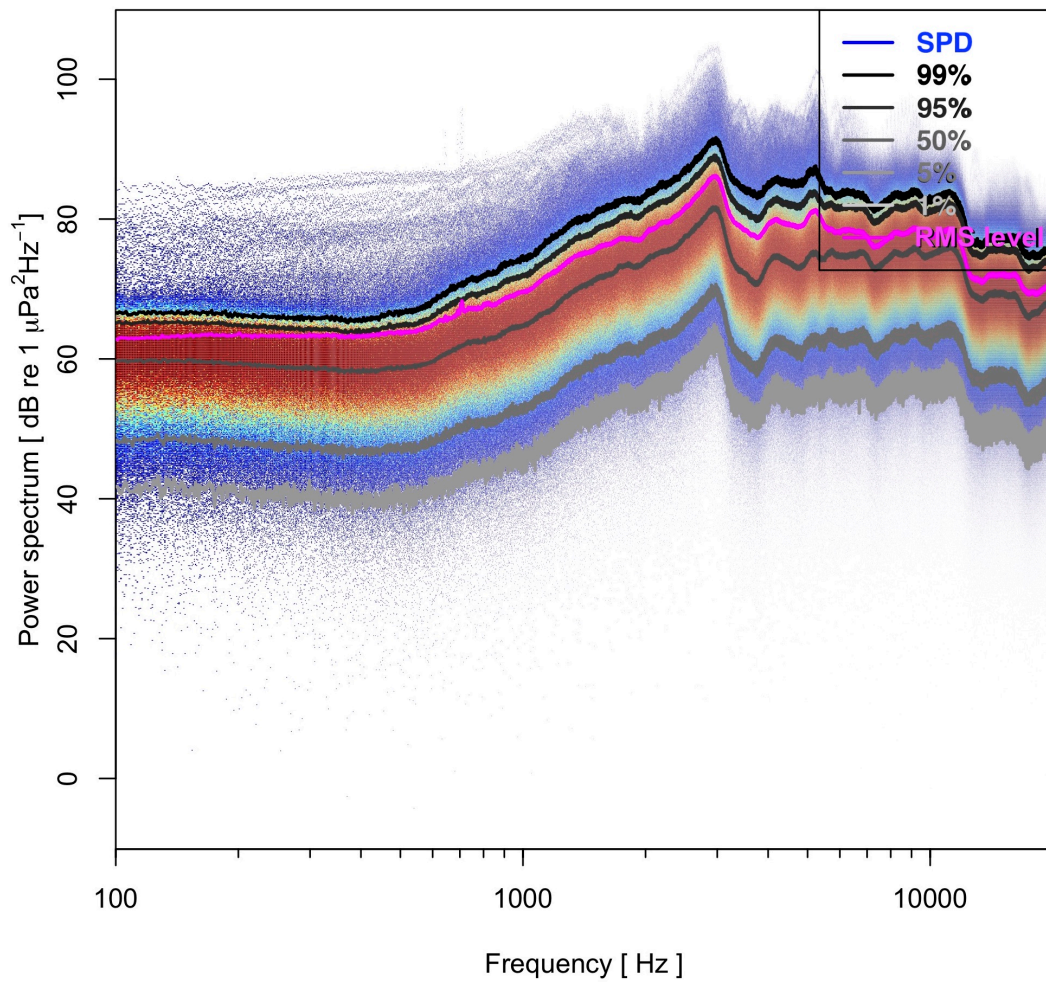

PG - 10 AM

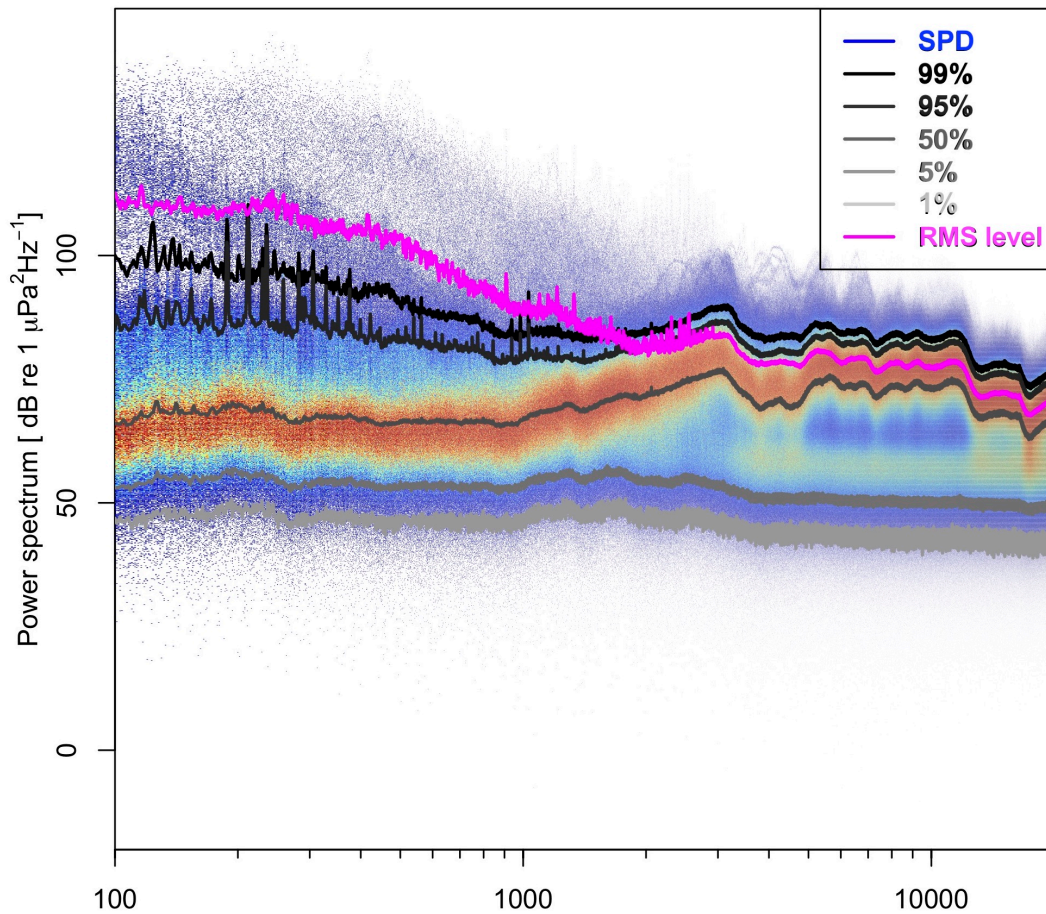

PG - 12 AM

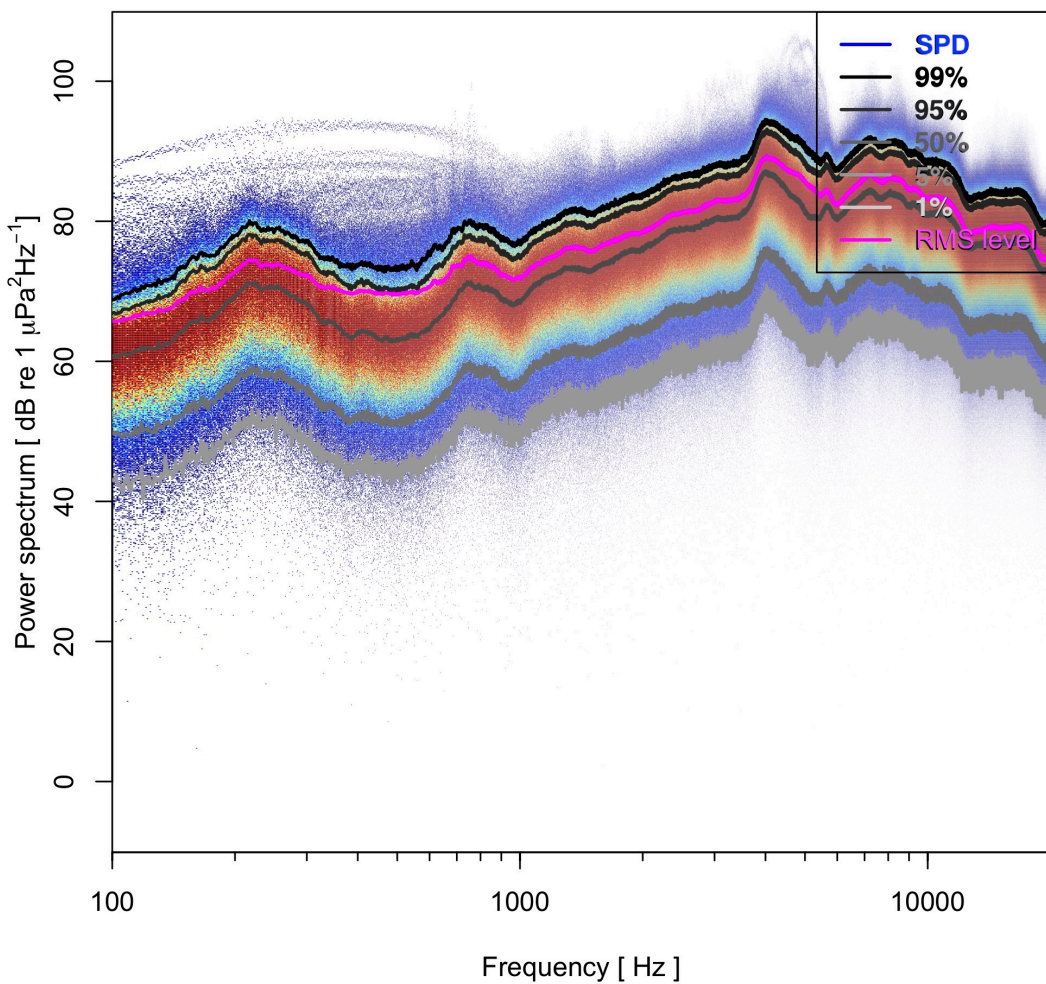

SA - 10 am

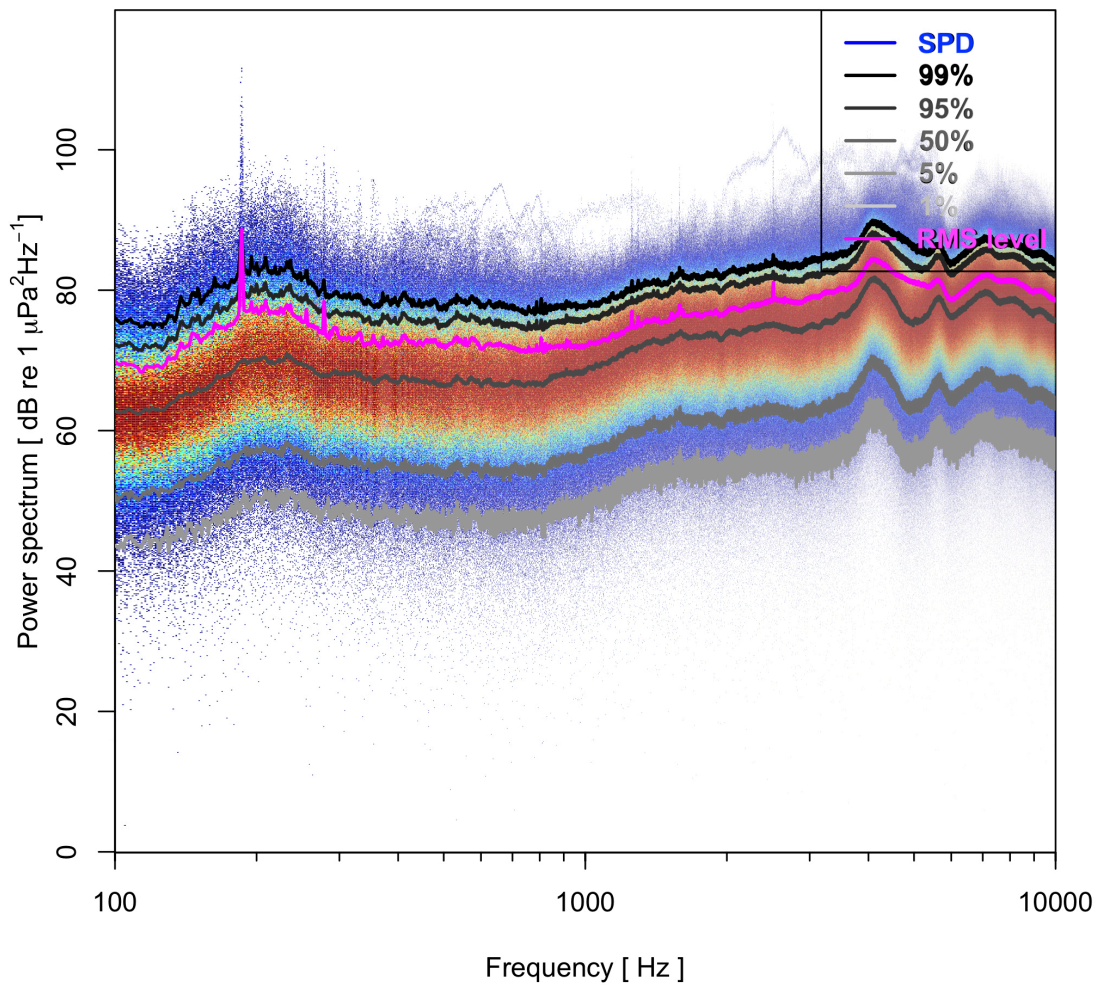

SA - 12 AM

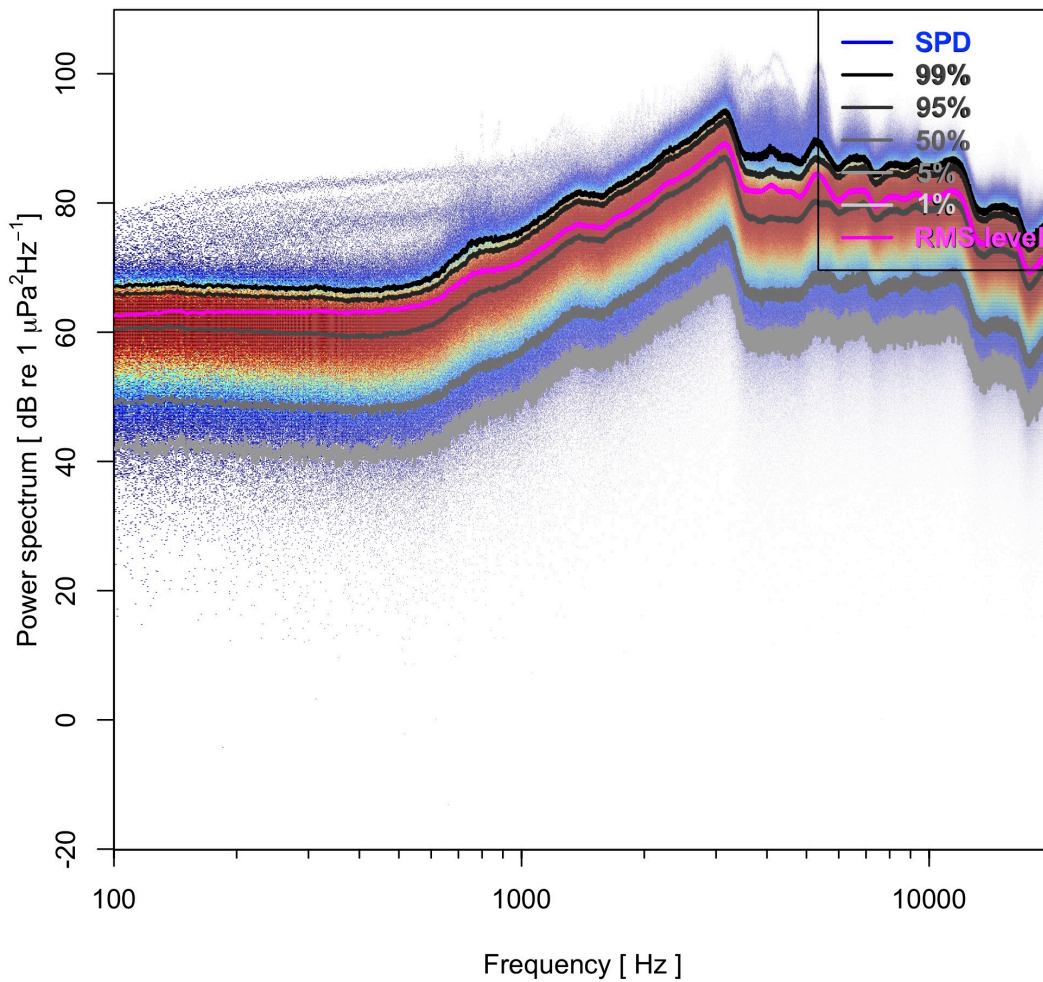

Supplement: Supp.Matt2.pdf [file Supp.Matt2.pdf]
