# Supplementary material for: Marine soundscape and fish biophony of a Mediterranean marine protected area
Source: PeerJ. 2021 Dec 15;9:e12551. doi: 10.7717/peerj.12551 (PMC8684326; doi:10.7717/peerj.12551)
Supplement: Supplemental Information 3 — The number of fish sounds per hour, hourly abundance, richness and shannon index as a function of site, time and hour and Sound Pressure Levels in the 8 octave bands (from 125 Hz to 16 kHz) as a function of site, time and hour. [file peerj-09-12551-s003.xlsx]

## Sheet: Foglio1
SITE	HOUR	TIME	BOAT/MIN	ALPHEIDAE	DOLPHINS	LDS	LPS	LFPT	LDSPS	DS	DSS	PS	FPT	DSS1	RPS	APPPS	UFPS_kwa	RICHNESS	ABUNDANCE	SHANNON
PG	9:00	DAY	0	146	0	0	0	0	0	0	0	0	0	0	0	0	33	1	0	0
PG	10:00	DAY	0	145	0	0	0	4	0	0	0	2	9	0	0	0	30	4	15	0.927617
PG	11:00	DAY	8.5	145	0	0	0	1	0	0	0	0	0	0	0	0	34	2	1	0
PG	12:00	DAY	5.5	61	0	0	0	1	0	0	0	0	0	0	0	0	0	1	1	0
PG	13:00	DAY	9.83333	145	0	0	1	0	0	0	0	1	0	0	0	0	24	3	2	0.693147
PG	14:00	DAY	15.1667	145	0	0	0	0	0	0	0	0	0	0	0	0	3	1	0	0
PG	15:00	DAY	10.1667	145	0	0	2	0	0	0	0	5	0	0	0	0	34	3	7	0.59827
PG	16:00	DAY	4.5	145	0	0	0	1	0	0	0	15	0	0	0	0	28	3	16	0.233792
PG	17:00	DAY	9.5	145	0	0	2	0	0	0	0	0	2	0	0	0	39	3	4	0.693147
PG	18:00	DAY	16.1667	145	0	0	0	0	0	0	0	7	0	0	0	0	21	2	7	0
PG	19:00	DAY	12.5	145	0	0	0	1	0	0	0	21	0	0	0	0	20	3	22	0.184907
PG	20:00	NIGHT	5.5	145	0	0	0	7	0	0	0	81	0	0	16	0	28	4	104	0.664264
PG	21:00	NIGHT	7.5	145	0	0	0	0	0	0	0	70	0	0	50	0	22	3	120	0.679193
PG	22:00	NIGHT	2	145	0	0	0	2	0	0	0	26	1	0	46	0	21	5	75	0.821297
PG	23:00	NIGHT	2.66667	145	0	0	0	0	0	0	0	8	0	0	20	11	692	4	39	1.02441
PG	0:00	NIGHT	0	145	0	0	0	0	0	0	0	3	0	0	75	126	1000	4	204	0.727537
PG	1:00	NIGHT	0.833333	145	0	0	0	0	0	5	1	6	0	0	83	23	1000	6	118	0.892058
PG	2:00	NIGHT	0	145	0	0	0	0	0	20	1	0	0	0	0	11	1000	4	32	0.769127
PG	3:00	NIGHT	2	145	0	0	0	0	0	9	3	0	0	0	0	9	576	4	21	1.00424
PG	4:00	NIGHT	0	145	0	0	0	0	0	11	5	1	0	0	0	12	522	5	29	1.15202
PG	5:00	NIGHT	0	146	0	0	0	0	0	3	0	0	0	0	0	28	638	3	31	0.317937
PG	6:00	NIGHT	0	146	0	0	0	0	0	0	1	0	0	0	0	22	367	3	23	0.178845
PG	7:00	DAY	0.5	146	0	0	0	0	0	3	2	0	0	0	0	25	205	4	30	0.56273
PG	8:00	DAY	1	146	0	0	0	0	0	0	0	2	0	0	0	0	23	2	2	0
PG	10:00	DAY	4.5	97	0	0	0	0	0	0	0	0	0	0	0	0	25	1	0	0
PG	11:00	DAY	9.5	146	0	0	0	0	0	0	0	0	0	0	0	0	54	1	0	0
PG	12:00	DAY	8.83333	146	0	0	0	0	0	0	0	0	0	0	0	0	123	1	0	0
PG	13:00	DAY	7.33333	145	0	0	0	0	0	0	0	1	0	0	0	0	165	2	1	0
PG	14:00	DAY	4.33333	145	0	0	0	0	0	0	0	1	1	0	0	0	169	3	2	0.693147
PG	15:00	DAY	8	145	0	0	0	0	0	0	0	3	0	0	0	0	149	2	3	0
PG	16:00	DAY	10.8333	145	0	0	0	0	0	0	0	2	0	0	0	0	113	2	2	0
PG	17:00	DAY	8.33333	145	0	0	0	0	0	0	0	0	0	0	0	0	92	1	0	0
PG	18:00	DAY	6.83333	146	0	0	0	0	0	0	0	2	0	0	0	0	99	2	2	0
PG	19:00	DAY	2.83333	146	0	0	0	0	0	0	0	1	0	0	0	0	93	2	1	0
PG	20:00	NIGHT	1.16667	146	0	0	0	0	0	1	0	17	0	2	0	0	183	4	20	0.518186
PG	21:00	NIGHT	0	148	0	2	0	0	0	1	0	4	0	0	0	0	1000	4	7	0.500402
PG	22:00	NIGHT	0	146	0	0	0	2	0	0	0	41	0	0	0	0	1000	3	43	0.188113
PG	23:00	NIGHT	1.16667	146	0	2	0	0	0	7	7	9	0	0	0	0	1000	5	25	1.09124
PG	0:00	NIGHT	0	145	0	0	0	0	0	2	2	14	0	1	0	0	1000	5	19	0.853945
PG	1:00	NIGHT	1.66667	145	0	0	0	0	0	3	0	8	0	0	0	0	1000	3	11	0.585953
PG	2:00	NIGHT	0	145	0	0	0	0	0	1	0	4	0	0	0	0	1000	3	5	0.500402
PG	3:00	NIGHT	0	145	0	0	0	0	0	0	0	11	0	0	0	0	1000	2	11	0
PG	4:00	NIGHT	0	145	0	0	0	0	0	0	0	19	0	0	0	0	1000	2	19	0
PG	5:00	NIGHT	0	146	0	1	0	0	0	2	3	8	0	0	0	0	654	5	14	0.925129
PG	6:00	NIGHT	0	146	0	0	0	0	0	4	0	1	0	0	0	0	25	3	5	0.500402
PG	7:00	DAY	3.5	145	0	0	0	0	0	0	0	2	0	0	0	0	7	2	2	0
PG	8:00	DAY	0	145	0	0	0	0	0	0	0	1	0	1	0	0	11	3	2	0.693147
PG	9:00	DAY	3.16667	145	0	0	0	0	0	0	0	2	0	0	0	0	19	2	2	0
BR	10:00	DAY	2.16667	85	0	0	1	0	0	0	0	0	0	0	0	0	45	2	1	0
BR	11:00	DAY	5.33333	145	0	0	0	0	0	0	0	3	0	0	0	0	60	2	3	0
BR	12:00	DAY	4.66667	145	0	0	1	0	0	2	0	0	0	0	0	0	86	3	3	0.636514
BR	13:00	DAY	1	145	0	0	0	0	0	1	0	2	0	0	0	0	107	3	3	0.636514
BR	14:00	DAY	2.83333	145	0	0	0	0	0	0	0	0	0	0	0	0	128	1	0	0
BR	15:00	DAY	5	145	0	0	0	0	0	1	0	2	0	0	0	0	103	3	3	0.636514
BR	16:00	DAY	5.5	145	0	0	0	0	0	0	0	1	6	0	0	0	114	3	7	0.410116
BR	17:00	DAY	3.5	145	0	0	0	0	0	0	0	0	0	0	0	0	112	1	0	0
BR	18:00	DAY	1.5	145	0	0	0	0	0	1	0	3	0	0	0	0	95	3	4	0.562335
BR	19:00	DAY	0.333333	145	0	0	0	0	0	0	0	3	0	0	0	0	91	2	3	0
BR	20:00	NIGHT	0	145	0	0	0	0	0	1	0	3	0	0	0	0	139	3	4	0.562335
BR	21:00	NIGHT	0	145	0	0	1	0	0	0	0	4	0	0	0	0	700	3	5	0.500402
BR	22:00	NIGHT	0	145	0	0	0	0	0	0	0	1	0	0	0	0	700	2	1	0
BR	23:00	NIGHT	0	145	0	0	0	0	0	0	0	0	0	0	0	0	576	1	0	0
BR	0:00	NIGHT	0	145	0	0	0	0	0	0	0	1	2	0	0	0	323	3	3	0.636514
BR	1:00	NIGHT	0	145	0	0	0	0	0	0	0	0	1	0	0	0	320	2	1	0
BR	2:00	NIGHT	0	145	0	0	0	0	0	0	0	0	0	0	0	0	650	1	0	0
BR	3:00	NIGHT	0	145	0	0	0	0	0	0	0	0	0	0	0	0	1229	1	0	0
BR	4:00	NIGHT	0	145	0	0	0	0	0	0	0	0	0	0	0	0	1348	1	0	0
BR	5:00	NIGHT	0	145	0	0	0	1	0	0	0	2	0	0	0	0	1596	3	3	0.636514
BR	6:00	NIGHT	0	145	0	0	0	0	0	0	0	2	0	0	0	0	5	2	2	0
BR	7:00	DAY	2	145	0	0	0	0	0	1	0	1	0	0	0	0	0	2	2	0.693147
BR	8:00	DAY	0	145	0	0	0	0	0	0	0	0	0	0	0	0	24	1	0	0
BR	9:00	DAY	0	85	0	0	0	0	0	0	0	0	1	0	0	0	15	2	1	0
BR	10:00	DAY	3.5	73	0	0	0	0	0	0	0	0	0	0	0	0	26	1	0	0
BR	11:00	DAY	5	145	0	0	0	0	0	0	0	0	0	0	0	0	139	1	0	0
BR	12:00	DAY	4.33333	145	0	0	0	0	0	0	0	1	0	0	0	0	166	2	1	0
BR	13:00	DAY	0.833333	145	0	0	0	1	0	0	0	1	0	0	0	0	159	3	2	0.693147
BR	14:00	DAY	3.66667	145	0	5	0	0	0	1	0	0	0	0	0	0	211	3	6	0
BR	15:00	DAY	9.16667	145	0	0	0	0	0	0	0	0	0	0	0	0	151	1	0	0
BR	16:00	DAY	2.5	72	0	0	0	0	0	0	0	0	0	0	0	0	82	1	0	0
BR	17:00	DAY	2.5	145	0	0	0	0	0	0	0	1	0	0	0	0	191	2	1	0
BR	18:00	DAY	2.5	145	0	0	0	0	0	0	0	1	1	0	0	0	151	3	2	0.693147
BR	19:00	DAY	1.33333	145	0	0	0	0	0	0	0	0	0	0	0	0	246	1	0	0
BR	20:00	NIGHT	0	145	0	0	0	0	0	0	0	0	0	0	0	0	397	1	0	0
BR	21:00	NIGHT	0	144	0	0	1	0	0	0	0	1	0	0	0	0	1000	3	2	0.693147
BR	22:00	NIGHT	0	145	0	0	0	0	0	0	0	1	0	0	0	0	1000	2	1	0
BR	23:00	NIGHT	0	145	0	0	0	0	0	0	0	0	0	0	0	0	1000	1	0	0
BR	0:00	NIGHT	0	145	0	0	0	0	0	0	0	1	0	0	0	0	1000	2	1	0
BR	1:00	NIGHT	0	145	0	0	0	0	0	0	0	2	0	0	0	0	1000	2	2	0
BR	2:00	NIGHT	0	145	5	0	0	0	0	0	0	1	0	0	0	0	1000	2	1	0
BR	3:00	NIGHT	0	145	0	0	0	0	0	0	0	1	0	0	0	0	1000	2	1	0
BR	4:00	NIGHT	0	145	0	0	0	0	0	0	0	1	0	0	0	0	1000	2	1	0
BR	5:00	NIGHT	0	145	0	0	0	0	0	0	0	0	0	0	0	0	1000	1	0	0
BR	6:00	NIGHT	1.16667	145	0	0	0	0	0	0	0	1	0	0	0	0	6	2	1	0
BR	7:00	DAY	2	145	0	0	0	0	0	0	0	1	1	0	0	0	12	3	2	0.693147
BR	8:00	DAY	0	145	0	0	0	0	0	0	0	1	0	0	0	0	44	2	1	0
BR	9:00	DAY	4.5	145	0	0	0	0	0	0	0	1	0	0	0	0	53	2	1	0
SA	10:00	DAY	12.5	121	0	0	0	0	0	0	0	0	0	0	0	0	52	1	0	0
SA	11:00	DAY	11.3333	145	0	0	0	0	0	0	0	1	0	0	0	0	52	2	1	0
SA	12:00	DAY	9.5	145	0	0	0	0	0	0	0	0	0	0	0	0	72	1	0	0
SA	13:00	DAY	3.66667	145	0	0	0	0	0	0	0	0	0	0	0	0	111	1	0	0
SA	14:00	DAY	7.83333	145	0	0	0	0	0	0	0	0	0	0	0	0	33	1	0	0
SA	15:00	DAY	10.3333	145	0	0	0	0	0	0	0	0	0	0	0	0	52	1	0	0
SA	16:00	DAY	5.5	145	0	0	0	1	0	0	0	0	1	0	0	0	37	3	2	0.693147
SA	17:00	DAY	7.83333	145	0	0	0	1	0	0	0	0	0	0	0	0	52	2	1	0
SA	18:00	DAY	2.16667	145	0	0	0	0	0	0	0	0	1	0	0	0	76	2	1	0
SA	19:00	DAY	4	145	0	0	0	0	0	0	0	0	1	0	0	0	30	2	1	0
SA	20:00	NIGHT	0.166667	145	0	0	0	0	0	0	0	0	0	0	0	0	77	1	0	0
SA	21:00	NIGHT	0.666667	145	0	0	0	0	0	0	0	1	0	0	0	0	1000	2	1	0
SA	22:00	NIGHT	0	145	0	0	0	0	0	0	0	0	0	0	0	0	1000	1	0	0
SA	23:00	NIGHT	1.33333	145	0	0	0	0	0	0	0	0	0	0	0	0	1000	1	0	0
SA	0:00	NIGHT	0	145	0	0	0	0	0	0	0	0	0	0	0	0	1000	1	0	0
SA	1:00	NIGHT	0	145	0	0	0	0	0	1	0	0	0	1	1	0	358	4	3	1.09861
SA	2:00	NIGHT	0	145	0	0	0	0	0	0	0	0	0	0	0	0	153	1	0	0
SA	3:00	NIGHT	0	145	0	0	0	0	0	0	0	0	0	0	0	0	192	1	0	0
SA	4:00	NIGHT	0	145	0	0	0	0	0	0	0	0	0	0	2	0	235	2	2	0
SA	5:00	NIGHT	0	145	0	0	0	0	0	0	0	1	0	0	0	0	119	2	1	0
SA	6:00	NIGHT	0	145	0	0	0	0	0	0	0	0	0	0	0	0	17	1	0	0
SA	7:00	DAY	0	145	0	0	0	0	0	0	0	0	0	0	0	0	55	1	0	0
SA	8:00	DAY	2	145	0	0	0	0	0	0	0	0	0	0	0	0	65	1	0	0
SA	9:00	DAY	6.33333	133	0	0	0	0	0	0	0	0	0	0	0	0	52	1	0	0
SA	9:00	DAY	11.3333	85	0	0	0	0	0	0	0	0	0	0	0	0	11	1	0	0
SA	10:00	DAY	12.6667	145	0	0	0	0	0	0	0	0	0	0	0	0	50	1	0	0
SA	11:00	DAY	18.1667	145	0	0	0	0	0	0	0	0	0	0	0	0	21	1	0	0
SA	12:00	DAY	9.83333	145	0	0	0	0	0	0	0	0	0	0	0	0	25	1	0	0
SA	13:00	DAY	10.3333	145	0	0	0	0	0	0	0	0	0	0	0	0	63	1	0	0
SA	14:00	DAY	14.1667	146	0	0	0	0	0	0	0	0	3	0	0	0	46	2	3	0
SA	15:00	DAY	11	145	0	0	0	0	0	0	0	0	5	0	0	0	40	2	5	0
SA	16:00	DAY	14	145	0	0	0	1	0	0	0	2	0	0	0	0	18	3	3	0.636514
SA	17:00	DAY	5.5	145	0	0	0	1	0	0	0	0	3	0	0	0	21	3	4	0.562335
SA	18:00	DAY	6.33333	145	0	0	0	4	0	0	0	2	3	0	0	0	10	4	9	1.06086
SA	19:00	DAY	7.16667	145	0	0	1	0	0	0	0	0	0	0	0	0	16	2	1	0
SA	20:00	NIGHT	4	145	0	0	0	0	0	0	0	4	0	0	0	1	1000	3	5	0.500402
SA	21:00	NIGHT	0	145	0	0	0	0	0	1	1	9	0	0	0	0	1000	4	11	0.600166
SA	22:00	NIGHT	1.66667	145	0	0	0	0	0	1	1	1	0	0	0	0	1000	4	3	1.09861
SA	23:00	NIGHT	0.166667	145	0	0	0	0	0	0	0	1	1	0	0	0	945	3	2	0.693147
SA	0:00	NIGHT	0	145	0	0	0	0	0	3	3	0	0	0	0	0	773	3	6	0.693147
SA	1:00	NIGHT	0	145	0	0	0	0	0	3	0	0	0	0	0	0	319	2	3	0
SA	2:00	NIGHT	0	145	0	0	0	0	0	3	0	0	0	0	0	0	271	2	3	0
SA	3:00	NIGHT	1.5	145	0	0	0	0	0	0	0	3	0	1	0	0	76	3	4	0.562335
SA	4:00	NIGHT	0.833333	145	0	0	0	0	0	0	0	1	0	1	0	0	35	3	2	0.693147
SA	5:00	NIGHT	2	145	0	0	0	0	0	0	0	1	1	0	0	0	12	3	2	0.693147
SA	6:00	NIGHT	3.5	145	0	0	5	0	0	0	0	1	0	0	0	0	7	3	6	0.450561
SA	7:00	DAY	0	145	0	0	0	0	0	0	0	1	0	0	0	0	7	2	1	0

## Sheet: Foglio2
SITE	HOUR	B125Hz	B250Hz	B500Hz	B1000Hz	B2000Hz	B4000Hz	B8000Hz	B16000Hz	time
BR	7 am	72.2824	79.3603	82.4006	89.1402	98.9799	108.621	109.466	106.743	day
BR	8 am	72.3069	79.5667	83.2062	89.2403	98.7967	108.509	109.529	106.959	day
BR	9 am	72.665	80.267	84.2328	89.8172	98.7815	108.374	109.527	107.074	day
BR	10 am	77.4324	86.8059	90.5446	91.8747	96.8672	98.3649	101.395	99.4415	day
BR	11 am	73.4459	80.791	85.7872	91.1404	99.4321	107.226	108.981	106.988	day
BR	12 pm	74.6015	81.2196	85.6948	91.0352	99.1654	107.375	108.645	106.675	day
BR	1 pm	75.0226	80.3851	85.3815	90.914	98.7897	106.93	108.606	106.651	day
BR	2 pm	75.7648	80.3349	85.3425	91.0202	98.3504	106.749	108.344	106.412	day
BR	3 pm	74.5549	80.7062	85.2476	90.6985	98.4652	106.545	108.053	106.244	day
BR	4 pm	75.2006	80.7077	85.1551	89.8793	97.6591	100.312	103.053	101.125	day
BR	5 pm	73.2665	80.5546	85.3363	90.6034	97.8723	106.015	107.747	105.815	day
BR	6 pm	72.4477	80.3033	84.958	89.9461	97.5591	105.927	107.626	105.658	day
BR	7 pm	72.2971	79.8988	83.7223	89.6225	98.2917	107.172	108.933	106.794	day
BR	8 pm	72.2501	79.3512	81.1395	89.4032	100.06	109.304	110.678	108.485	day
BR	9 pm	72.3549	79.3479	81.3987	96.9707	103.137	112.415	113.429	110.978	night
BR	10 pm	72.4249	79.3765	81.1724	94.8321	103.585	108.888	111.675	109.127	night
BR	11 pm	72.2991	79.1097	80.8644	92.4159	103.414	112.939	113.765	111.289	night
BR	12 am	72.2893	79.1211	80.7105	91.5044	102.877	112.492	113.47	110.915	night
BR	1 am	72.3166	79.1462	80.65	91.4049	102.234	111.93	113.096	110.481	night
BR	2 am	72.3193	79.1787	80.6127	91.9433	101.957	111.708	112.95	110.345	night
BR	3 am	72.263	79.1673	80.6311	92.4274	101.889	111.555	112.562	110.09	night
BR	4 am	72.2879	79.1189	80.5897	92.6217	101.727	111.452	112.037	109.758	night
BR	5 am	72.2862	79.2253	80.8281	93.3243	103.112	112.928	113.335	110.98	night
BR	6 am	72.3193	79.3861	81.4071	89.6961	101.203	110.818	111.243	108.626	night
PG	7 am	72.24	80.2658	82.5169	90.4188	103.625	114.146	115.946	112.112	day
PG	8 am	72.2212	80.0727	82.752	88.9911	101.836	112.321	114.243	110.542	day
PG	9 am	72.472	80.484	84.4998	89.4399	102.201	110.701	112.495	109.691	day
PG	10 am	72.7034	83.6963	86.8154	90.4594	101.475	109.566	111.599	108.882	day
PG	11 am	72.4548	83.6573	87.5799	91.6221	101.634	109.743	111.619	108.704	day
PG	12 pm	73.9899	86.8268	89.2046	91.3612	100.592	105.733	110.172	107.094	day
PG	1 pm	73.3247	85.1944	88.1156	91.0401	101.155	111.207	113.385	106.346	day
PG	2 pm	72.7157	84.2076	86.9309	90.4902	100.276	110.607	112.785	109.293	day
PG	3 pm	72.6763	84.9023	86.7595	89.8267	99.8418	109.952	112.594	109.055	day
PG	4 pm	72.9025	83.7877	86.5363	89.8068	100.145	110.571	113.314	109.986	day
PG	5 pm	72.459	83.0874	86.6419	89.4672	99.6559	109.839	112.491	109.127	day
PG	6 pm	73.0744	84.76	87.0481	90.4969	99.6452	109.362	112.165	108.791	day
PG	7 pm	72.4921	83.7993	85.9	89.0761	99.633	109.382	112.231	108.919	day
PG	8 pm	72.8618	81.9651	83.8386	89.0255	100.888	110.702	113.305	110.114	day
PG	9 pm	72.3255	82.4107	84.4361	91.013	101.744	111.147	113.694	110.495	night
PG	10 pm	72.1983	81.9189	84.3835	92.7571	102.395	112.326	114.622	111.409	night
PG	11 pm	71.8477	79.6706	81.8731	91.9951	103.153	113.891	115.757	112.382	night
PG	12 am	72.2898	81.1685	83.9617	93.4162	103.358	114.186	115.825	112.139	night
PG	1 am	72.2962	79.8072	81.6643	91.3262	102.954	113.633	115.271	111.459	night
PG	2 am	72.4081	79.5172	81.3488	91.0305	103.086	113.648	115.266	111.542	night
PG	3 am	72.2593	79.6068	81.4146	90.6033	102.83	113.438	115.02	111.264	night
PG	4 am	72.1954	79.6662	81.733	90.1091	102.701	113.441	114.948	111.263	night
PG	5 am	72.1653	79.9722	81.613	89.7415	103.11	112.787	114.719	111.073	night
PG	6 am	72.2609	79.9728	81.9167	89.5801	103.11	112.617	114.628	110.941	night
SA	7 am	73.4253	80.2691	83.4011	87.7624	99.9012	96.6402	99.5866	99.2019	day
SA	8 am	73.884	81.0583	85.556	89.1818	100.044	100.981	107.88	104.586	day
SA	9 am	96.5264	96.8127	96.7083	94.7681	91.2867	89.218	90.002	92.4696	day
SA	10 am	73.2182	84.7984	89.4252	92.8826	102.415	107.715	111.076	108.115	day
SA	11 am	73.3617	84.9199	89.6721	93.3653	102.627	107.719	110.864	107.848	day
SA	12 pm	72.6702	83.2535	87.7396	91.7543	101.577	107.24	110.477	107.62	day
SA	1 pm	72.5442	82.5851	86.8991	90.985	101.197	107.167	110.409	107.408	day
SA	2 pm	72.7735	83.2661	88.3141	91.8152	101.389	107.754	110.457	107.651	day
SA	3 pm	72.6571	83.2546	88.6113	91.2528	101.199	107.508	110.334	107.55	day
SA	4 pm	72.5825	82.4371	88.3387	90.3639	100.845	106.685	110.021	107.155	day
SA	5 pm	72.3846	81.242	86.9485	89.789	100.924	107.436	110.237	107.482	day
SA	6 pm	72.3759	80.3852	84.5371	89.821	101.675	109.655	111.525	108.749	day
SA	7 pm	72.2794	79.9681	83.0031	90.453	102.973	111.08	112.596	109.967	day
SA	8 pm	72.2973	79.7837	82.0383	91.7565	104.702	112.958	114.176	111.093	day
SA	9 pm	72.3122	79.9391	84.1363	97.4602	106.248	113.358	114.698	111.554	night
SA	10 pm	72.2421	79.5548	82.9048	95.7361	105.923	112.742	114.447	111.068	night
SA	11 pm	72.1775	79.5367	81.746	93.4569	105.397	112.687	113.906	110.499	night
SA	12 am	72.225	79.4974	81.5256	92.4315	105.375	112.366	113.537	110.11	night
SA	1 am	72.1916	79.6082	81.5809	91.4959	105.081	111.249	112.958	109.517	night
SA	2 am	72.6999	79.8602	82.2422	91.516	104.828	111.09	112.804	109.295	night
SA	3 am	72.6667	80.0866	82.6642	91.6988	105.228	112.753	113.673	110.375	night
SA	4 am	72.7283	80.4511	83.3239	92.5556	106.763	114.078	114.48	112.051	night
SA	5 am	72.7074	80.3169	83.0008	93.0507	107.552	113.562	115.531	112.174	night
SA	6 am	73.134	79.4273	81.4196	89.1222	104.074	105.704	112.056	108.514	night
